# Supplementary material for: Testing the PPAR hypothesis of tobacco use disorder in humans: A randomized trial of the impact of gemfibrozil (a partial PPARα agonist) in smokers
Source: PLoS One. 2018 Sep 27;13(9):e0201512. doi: 10.1371/journal.pone.0201512 (PMC6160014; doi:10.1371/journal.pone.0201512)
Supplement: S1 Dataset — (XLSX) [file pone.0201512.s002.xlsx]

## Sheet: Sheet1
Medication	Gemfibrozil								Placebo								Significance
Cue	Neutral				Smoking				Neutral				Smoking				Medication*Cue*Time p value
Time	before	at	after		before	at	after		before	at	after		before	at	after
Self-reported
Vas craving (mean)	45.8889	51.3333	54.7692		45.1481	51.037	54.7407		39	43.7037	52.1111		31.1481	44.0741	48.3704		0.77
SEM=	31.1341	31.7151	28.8861		28.3341	32.7361	28.2837		26.774	26.5617	26.5943		25.681	27.4786	26.2446
Vas urge	41.8889	50.8889	60.1538		41.7037	48.6296	52.9259		38.5185	45.5556	52.3704		31.6296	44.5926	48.037		0.57
SEM=	5.51334	5.62461	5.01215		5.37187	6.0268	5.92569		4.98984	5.20172	5.37938		4.62655	5.40477	5.24187
Vas positive	67.2222	62.8519	61.8148		62.8519	61.1852	63.1481		64.6667	60.2593	56.963		63	60.2593	60.6296		0.977
SEM=	4.07561	4.32435	4.67796		4.74047	5.17253	4.55411		4.31555	4.63315	4.91451		4.32478	4.75424	4.483
Vas negative	15.1481	20.6296	23.5		19.6667	19.4444	20.5926		13.2963	14.7037	20.037		12.2593	17.3704	16.4815		0.56
SEM=	4.1192	4.76817	5.01997		4.74987	4.75566	4.71563		2.99896	3.22288	4.1901		2.81914	3.95313	3.53105
Positive mood	10.2222	9.66667	9.59259		10.3704	9.88889	10.1852		10.5926	9.74074	9.03704		10.0741	8.92593	8.85185		0.96
SEM=	1.10339	1.10425	1.1476		1.24853	1.26236	1.17674		1.00321	1.02892	1.07746		0.85556	1.02661	0.96033
Negative mood	2.18519	2.37037	2.33333		2	2.22222	2.25926		1.44444	1.66667	2.33333		1.37037	2	1.81481		0.745
SEM=	1.11073	1.13498	0.904248		0.945826	1.15881	0.934603		0.550403	0.617872	0.651538		0.52338	0.677266	0.557357
TCQ1	6.51852	7.59259	7.59259		6.74074	7.11111	7.74074		6.25926	6.81481	7.18519		6.44444	7.48148	7.48148		0.548
SEM=	0.817142	0.938659	0.996088		0.734949	0.839436	0.923872		0.738815	0.82351	0.867319		0.80655	0.918891	0.869506
TCQ2	13.5185	14.5556	14.963		13.037	14.4074	14.2963		11.1852	12.1852	12.8148		10.3333	12.8889	13.5185		0.59
SEM=	1.06401	1.12639	1.09711		1.15899	1.11358	1.11173		1.04191	1.05414	1.09393		0.951831	1.01461	0.991948
TCQ3	7.2963	7.85185	8.25926		7.59259	8	8.22222		7.25926	7.11111	7.11111		6.62963	6.88889	7.51852		0.59
SEM=	0.876757	0.924044	0.989392		0.920268	0.945826	0.929622		0.861643	0.887285	0.841132		0.840818	0.901618	0.949389
TCQ4	10.963	11.4815	12		11	10.8519	11.2222		9.7037	10.0741	10.1852		9.14815	9.81481	10.1481		0.66
SEM=	0.887523	0.912669	0.875432		0.852347	0.920955	0.862867		0.800311	0.886631	0.8304		0.836666	0.855745	0.8212
Physiological mean			15 mins	30 mins			15 mins	30 mins			15 mins	30 mins			15 mins	30 mins
Heart rate	71.2321	71.8501	69.4416	68.7094	70.8053	70.5308	69.4592	67.494	71.8838	69.8965	70.6294	68.7422	71.8199	71.5437	70.5782	68.5121	0.779
SEM=	1.72912	2.06241	1.84366	2.03011	1.92149	1.95673	1.89428	1.69216	1.70523	1.73439	1.6805	1.60067	1.84825	1.75861	1.78956	1.71565
Skin temperature	23.9848	24.058	23.8804	23.9475	23.9505	23.9057	23.8635	23.7926	24.0926	24.0703	24.0818	23.9486	23.7327	23.8253	23.6719	23.4768	0.95
SEM=	0.262574	0.248616	0.281182	0.274026	0.282138	0.2879	0.280622	0.264478	0.24818	0.254914	0.22905	0.217219	0.269173	0.267568	0.269351	0.292883
Skin conducatnce	2.04652	2.47913	2.09602	1.92392	2.49385	2.7626	2.34733	2.21814	2.06823	2.6018	2.15777	1.9718	2.48815	2.64026	2.34164	2.01547	0.95
SEM=	0.45656	0.542675	0.423971	0.41086	0.507501	0.591715	0.475716	0.49722	0.69932	0.741078	0.587484	0.586625	0.798725	0.875809	0.739855	0.71049
Forced choice test
Medication	Gemfibrozil	Placebo
mean	0.77	0.79
SEM=	0.41	0.4
medication p value	0.668
Mean cigarette/day for 7 days
Medication	Gemfibrozil	Placebo	Baseline
mean	10.788	10.449	15.668
SEM=	1.24647	1.24647	1.35726
medication p value	0.018
